# Supplementary material for: Development of Flame-Retardant Polylactic Acid Formulations for Additive Manufacturing
Source: MDPI journal article supplement (doi:10.3390/polym16081030), 2024-04-10
Supplement: s1 [file s1]

## Supplementary information

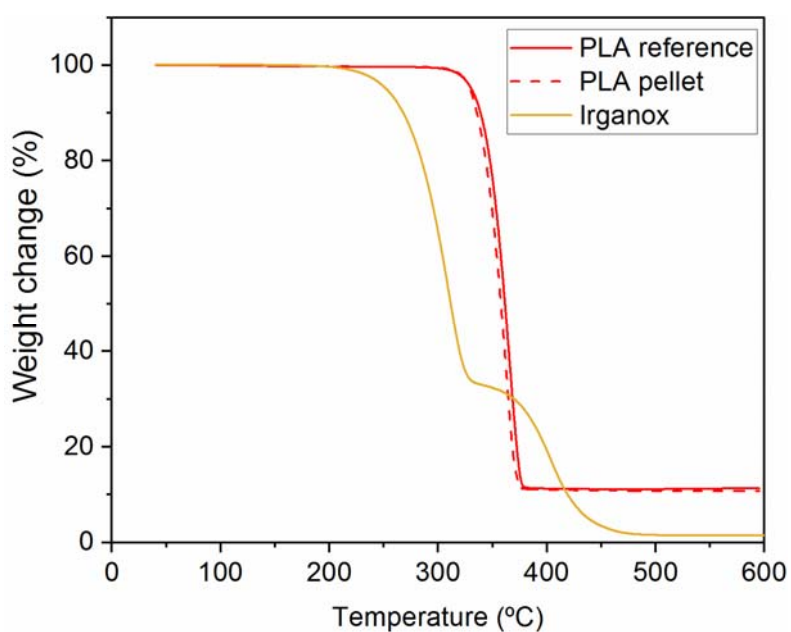

**Figure S1.** TGA of the reference PLA and PLA pellet and pure Irganox under inert atmosphere.

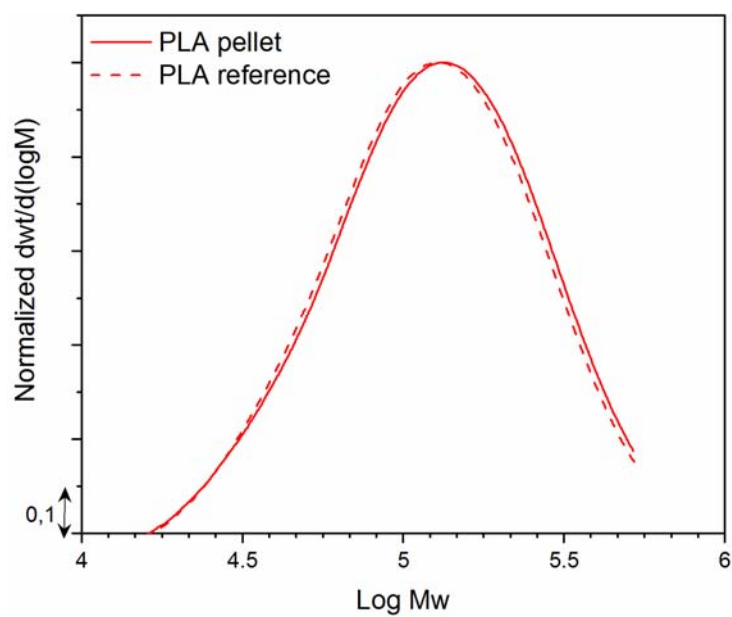

**Figure S2.** Molecular weight distributions of reference PLA and PLA pellet.

**Table S1.** MARHE values according to the EN 45545-2 standard for R1 (interior vertical surfaces) and R7 (external surfaces) requirements and different hazard levels (HL).

| Requirement set<br>(used for)                                                                                           | Test method<br>reference                            | Parameter<br>and unit        | Maximum or<br>Minimum | HL1     | HL2     | HL3     |
|-------------------------------------------------------------------------------------------------------------------------|-----------------------------------------------------|------------------------------|-----------------------|---------|---------|---------|
| R1<br>(IN1A; IN1B; IN1D;<br>IN1E; IN4;<br>IN5; IN6A;<br>IN7; IN8;<br>IN9B;<br>IN11; IN12A; IN12B;<br>IN14; EX4A;<br>F5) | T02<br>ISO 5658-2                                   | $CFE$<br>$\text{kWm}^{-2}$   | Minimum               | 20<br>a | 20<br>a | 20<br>a |
|                                                                                                                         | T03.01<br>ISO 5660-1:<br>50 $\text{kWm}^{-2}$       | $MARHE$<br>$\text{kWm}^{-2}$ | Maximum               | -       | 90      | 60      |
|                                                                                                                         | T10.01<br>EN ISO 5659-2:<br>50 $\text{kWm}^{-2}$    | $D_s(4)$<br>dimensionless    | Maximum               | 600     | 300     | 150     |
|                                                                                                                         | T10.02<br>EN ISO 5659-2:<br>50 $\text{kWm}^{-2}$    | $VOF4$<br>min                | Maximum               | 1 200   | 600     | 300     |
|                                                                                                                         | T11.01<br>EN 17084 Method 1<br>50 $\text{kWm}^{-2}$ | $CIT_G$<br>dimensionless     | Maximum               | 1,2     | 0,9     | 0,75    |
| R7<br>(IN6B; IN12C; EX1A;<br>EX1C; EX3; EX4B;<br>EX5;<br>EX6A; EX7; EX8;<br>EL3C)                                       | T02<br>ISO 5658-2                                   | $CFE$<br>$\text{kWm}^{-2}$   | Minimum               | 20<br>a | 20<br>a | 20<br>a |
|                                                                                                                         | T03.01<br>ISO 5660-1:<br>50 $\text{kWm}^{-2}$       | $MARHE$<br>$\text{kWm}^{-2}$ | Maximum               | -       | 90      | 60      |
|                                                                                                                         | T10.04<br>EN ISO 5659-2:<br>50 $\text{kWm}^{-2}$    | $D_s$ max.<br>dimensionless  | Maximum               | -       | 600     | 300     |
|                                                                                                                         | T11.01<br>EN 17084 Method 1<br>50 $\text{kWm}^{-2}$ | $CIT_G$<br>dimensionless     | Maximum               | -       | 1,8     | 1,5     |
